# Supplementary material for: miR-16-5p Is a Stably-Expressed Housekeeping MicroRNA in Breast Cancer Tissues from Primary Tumors and from Metastatic Sites
Source: Int J Mol Sci. 2016 Jan 26;17(2):156. doi: 10.3390/ijms17020156 (PMC4783890; doi:10.3390/ijms17020156)
Supplement: Supplementary file 1 [file ijms-17-00156-s001.xlsx]

## Sheet: Table S1 (Data)
Table S1. Expression (CT-values) of reference RNAs, geometric means of CT-values for groups of reference microRNAs, as well as information about source and status of 58 metastatic breast cancers.
SAMPLE	MBC2	MBC22	MBC26	MBC33	MBC37	MBC38	MBC41	MBC46	MBC51	MBC94	MBC96	MBC110	MBC115	MBC40	MBC42	MBC59	MBC63	MBC66	MBC67	MBC74	MBC81	MBC196	MBC202	MBC206	MBC207	MBC212	MBC213	MBC218	MBC221	MBC229	MBC21	MBC62	MBC84	MBC86	MBC87	MBC93	MBC102	MBC104	MBC107	MBC122	MBC128	MBC131	MBC134	MBC138	MBC139	MBC140	MBC152	MBC157	MBC158
SOURCE	PRIM	PRIM	PRIM	METAS	PRIM	PRIM	PRIM	PRIM	PRIM	PRIM	PRIM	PRIM	PRIM	PRIM	PRIM	PRIM	PRIM	METAS	PRIM	PRIM	PRIM	METAS	METAS	METAS	METAS	METAS	PRIM	METAS	METAS	METAS	PRIM	PRIM	PRIM	PRIM	PRIM	PRIM	PRIM	PRIM	PRIM	PRIM	PRIM	PRIM	PRIM	PRIM	PRIM	METAS	PRIM	PRIM	PRIM
STATUS	HR+	HR+	HR+	HR+	HR+	HR+	HR+	HR+	HR+	HR+	HR+	HR+	HR+	HR+	HR+	HR+	HR+	HR+	HR+	HR+	HR+	HR+	HR+	HR+	HR+	TNBC	HER2+	HR+	TNBC	TNBC	TNBC	HR+	TNBC	HR+	HER2+	TNBC	HR+	HR+	TNBC	HER2+	HR+	TNBC	TNBC	TNBC	HR+	HR+	TNBC	HR+	HR+
U6snRNA	20.954	20.672	21.135	20.154	18.608	17.263	17.27	19.394	20.857	18.397	22.712	20.893	20.177	18.025	20.199	19.533	20.614	17.762	18.648	19.286	17.117	18.908	18.142	17.644	17.066	18.948	17.602	17.623	17.985	20.968	19.078	17.418	18.122	18.522	17.544	17.625	21.007	19.511	17.236	18.7	17.271	17.039	17.138	16.965	17.51	19.171	17.897	17.682	18.974
hsa-miR-126-3p	24.615	24.971	25.076	26.993	25.295	23.608	24.434	26.584	29.752	26.007	32.326	28.223	31.073	24.876	26.879	23.79	27.272	23.875	24.465	24.19	22.676	23.415	23.252	24.27	25.065	23.197	25.188	24.549	24.672	25.494	23.352	25.291	24.437	23.391	24.193	23.164	26.997	25.914	23.503	24.721	25.585	24.901	23.443	23.558	25.141	24.979	23.981	25.063	23.837
hsa-miR-29a-3p	27.353	27.63	26.977	27.583	26.613	27.201	27.721	28.948	30.585	29.427	33.319	30.422	31.97	29.163	29.97	26.342	29.972	26.397	26.366	27.038	23.823	26.96	25.978	24.183	27.968	26.542	27.267	25.232	27.196	28.866	25.574	27.806	24.884	25.755	24.838	24.868	27.892	28.399	26.14	27.419	27.325	28.02	25.178	24.836	30.132	27.855	25.542	27.001	28.374
hsa-miR-199b-3p	27.281	28.103	27.355	28.382	30.102	28.569	28.302	32.409	31.333	31.301	36.317	31.643	31.514	29.497	31.31	25.914	31.398	29.349	29.148	26.894	24.944	30.41	29.195	29.324	25.474	28.371	29.322	27.865	29.084	27.964	26.604	27.756	25.418	25.738	25.439	26.628	30.347	28.915	25.67	29.332	30.572	30.075	25.469	27.066	29.378	29.919	26.794	27.435	29.714
hsa-miR-222-3p	28.531	27.879	27.3	27.406	27.521	26.572	26.658	28.845	31.38	28.382	31.604	28.705	30.877	27.321	30.328	26.991	30.353	28.842	25.747	27.169	25.284	25.957	26.848	22.186	24.957	25.876	26.749	23.647	25.386	27.679	26.247	26.397	24.853	25.866	24.901	24.607	29.741	28.345	25.088	27.549	27.293	24.274	25.093	24.961	27.226	26.854	25.335	26.174	26.8
hsa-miR-146a-5p	27.859	28.204	27.605	30.205	27.559	28.144	27.926	30.394	31.517	28.524	32.607	30.336	32.419	27.47	29.47	26.912	31.079	27.441	24.973	27.968	26.179	27.294	26.522	26.425	28.219	25.316	27.53	26.602	27.767	27.984	27.226	26.874	25.561	26.86	26.343	26.362	29.968	28.777	26.257	26.33	28.976	26.278	26.2	24.324	29.038	27.885	26.171	27.97	27.726
hsa-miR-191-5p	25.329	25.635	25.975	26.021	24.724	23.482	24.412	28.993	32.609	26.355	32.576	27.1	31.272	23.251	26.731	24.574	25.48	23.486	24.872	25.09	22.378	24.004	25.185	22.433	23.367	24.669	24.559	24.652	24.777	25.301	24.47	23.96	24.622	24.662	22.756	23.449	26.292	25.279	24.385	24.084	24.453	24.883	23.477	22.206	24.682	24.22	23.348	24.266	25.077
hsa-miR-150-5p	30.08	29.195	28.379	30.824	26.52	25.768	27.391	30.829	33.034	27.376	31.574	29.888	32.094	26.452	28.729	28.529	30.105	28.512	23.534	29.316	25.696	26.617	27.393	26.912	28.328	25.597	28.662	28.491	28.784	29.795	26.965	25.64	28.965	27.456	28.205	26.933	31.212	31.089	27.177	25.218	27.07	27.88	28.29	25.726	27.954	26.483	25.565	27.725	26.816
hsa-miR-196b-5p	31.255	32.089	30.932	35.606	30.901	29.361	28.851	32.204	33.669	31.965	34.918	32.048	33.536	31.761	32.677	29.871	32.919	32.434	30.706	29.222	28.208	34.836	35.274	31.983	30.474	32.293	34.288	35.504	33.373	30.864	30.156	31.47	30.335	28.469	29.414	30.881	32.425	32.154	25.594	32.596	33.224	34.191	29.623	31.215	30.777	32.056	29.786	30.841	30.325
hsa-miR-145-5p	26.064	26.456	26.623	27.033	30.262	27.648	29.342	29.302	34.304	29.984	35.113	30.118	34.168	27.913	30.255	25.631	29.66	27.413	27.286	26.803	26.337	26.981	27.239	28.276	28.222	26.381	28.222	25.926	26.641	27.554	24.748	25.642	24.268	24.39	25.213	25.374	29.387	26.327	26.349	28.109	27.857	28.365	24.246	27.171	29.459	27.658	26.423	25.521	27.19
hsa-miR-628-5p	33.696	33.176	34.959	31.26	33.158	31.777	30.93	32.206	34.907	33.215	35.667	34.348	35.919	34.982	34.704	33.765	35.48	33.14	32.015	34.746	31.334	35.168	35.105	31.347	32.044	33.093	34.243	32.282	31.132	34.646	32.191	34.644	32.987	32.01	32.12	31.927	34.23	33.73	30.084	34.517	30.76	25.211	32.238	32.021	32.931	34.752	30.377	35.052	33.147
hsa-miR-16-5p	25.365	25.726	25.568	26.858	24.611	24.493	24.614	28.436	35.047	26.792	34.679	29.427	33.872	25.955	27.193	26.723	27.415	24.626	24.861	25.135	22.87	24.244	24.685	23.257	24.452	24.666	25.584	24.011	25.406	26.007	24.402	25.382	24.152	23.989	23.711	23.355	24.41	26.363	23.203	25.076	24.109	24.393	23.88	23.626	26.207	23.446	22.884	25.382	24.887
M2	26.237	26.5875	26.3405	28.599	26.427	25.876	26.18	28.489	30.6345	27.2655	32.4665	29.2795	31.746	26.173	28.1745	25.351	29.1755	25.658	24.719	26.079	24.4275	25.3545	24.887	25.3475	26.642	24.2565	26.359	25.5755	26.2195	26.739	25.289	26.0825	24.999	25.1255	25.268	24.763	28.4825	27.3455	24.88	25.5255	27.2805	25.5895	24.8215	23.941	27.0895	26.432	25.076	26.5165	25.7815
M3	26.609	26.935	26.5527	28.2603	26.489	26.3177	26.6937	28.642	30.618	27.986	32.7507	29.6603	31.8207	27.1697	28.773	25.6813	29.441	25.9043	25.268	26.3987	24.226	25.8897	25.2507	24.9593	27.084	25.0183	26.6617	25.461	26.545	27.448	25.384	26.657	24.9607	25.3353	25.1247	24.798	28.2857	27.6967	25.3	26.1567	27.2953	26.3997	24.9403	24.2393	28.1037	26.9063	25.2313	26.678	26.6457
M4	27.0895	27.171	26.7395	28.0467	26.747	26.3813	26.6848	28.6927	30.8085	28.085	32.464	29.4215	31.5847	27.2075	29.1618	26.0087	29.669	26.6387	25.3878	26.5912	24.4905	25.9065	25.65	24.266	26.5523	25.2328	26.6835	25.0075	26.2553	27.5057	25.5998	26.592	24.9338	25.468	25.0687	24.7502	28.6495	27.8588	25.247	26.5048	27.2948	25.8682	24.9785	24.4198	27.8843	26.8933	25.2572	26.552	26.6842
M5	26.7374	26.8638	26.5866	27.6416	26.3424	25.8014	26.2302	28.7528	31.1686	27.739	32.4864	28.9572	31.5222	26.4162	28.6756	25.7218	28.8312	26.0082	25.2846	26.291	24.068	25.526	25.557	23.8994	25.9152	25.12	26.2586	24.9364	25.9596	27.0648	25.3738	26.0656	24.8714	25.3068	24.6062	24.49	28.178	27.3428	25.0746	26.0206	26.7264	25.6712	24.6782	23.977	27.2438	26.3586	24.8754	26.0948	26.3628
M6	26.5087	26.6742	26.4168	27.511	26.0538	25.5833	25.9608	28.7	31.815	27.5812	32.8518	29.0355	31.9138	26.3393	28.4285	25.8887	28.5952	25.7778	25.214	26.0983	23.8683	25.3123	25.4117	23.7923	25.6713	25.0443	26.1462	24.7822	25.8673	26.8885	25.2118	25.9517	24.7515	25.0872	24.457	24.3008	27.55	27.1795	24.7627	25.8632	26.2902	25.4582	24.5452	23.9185	27.071	25.8732	24.5435	25.976	26.1168
M2: miR-126-3p| miR-146a-5p
M3: miR-126-3p| miR-146a-5p|miR-29a-3p
M4: miR-146a-5p|miR-29a-3p|miR-126-3p|miR-222-3p
M5: miR-126-3p| miR-146a-5p|miR-29a-3p| miR-222-3p| miR-191-5p
M6: miR-126-3p| miR-146a-5p|miR-29a-3p| miR-191-5p |miR-222-3p|miR-16-5p
[truncated: 9 more columns]

## Sheet: Table S2 (NormFinder)
Table S2. Results from Normfinder analysis across primary sites (PRIM) and metastatic sites (METAS) (upper part) and if PRIM and METAS considered as one group together (lower part)
PRIM + METAS
Ordered	GroupDif	GroupSD	Stability	IGroupSD.METAS	IGroupSD.PRIM	IGroupDif.METAS	IGroupDif.PRIM		PairOfGenes
hsa-miR-126-3p	0.24	0.62	0.31	0.86	0.5	-0.12	0.12		Gene1	Gene2	Stability
hsa-miR-191-5p	0.29	0.98	0.37	0.74	1.06	-0.15	0.15		hsa-miR-126-3p	hsa-miR-29a-3p	0.3
hsa-miR-146a-5p	0.35	0.75	0.38	0.93	0.67	-0.17	0.17		hsa-miR-126-3p	hsa-miR-146a-5p	0.3
hsa-miR-29a-3p	0.32	0.86	0.39	1.02	0.8	-0.16	0.16		hsa-miR-126-3p	hsa-miR-191-5p	0.29
U6snRNA	0.24	1.34	0.4	0.87	1.48	0.12	-0.12		hsa-miR-29a-3p	hsa-miR-146a-5p	0.33
hsa-miR-199b-3p	0.25	1.36	0.47	1.48	1.31	0.13	-0.13		hsa-miR-29a-3p	hsa-miR-191-5p	0.32
hsa-miR-145-5p	0.32	1.44	0.49	1.35	1.48	-0.16	0.16		hsa-miR-146a-5p	hsa-miR-191-5p	0.32
hsa-miR-150-5p	0.32	1.49	0.52	1.62	1.44	-0.16	0.16
hsa-miR-16-5p	0.64	1.25	0.53	0.61	1.42	-0.32	0.32
hsa-miR-222-3p	0.87	0.86	0.64	1.29	0.63	-0.44	0.44
hsa-miR-628-5p	0.88	1.87	0.73	1.51	1.98	0.44	-0.44
hsa-miR-196b-5p	1.97	1.59	1.1	1.84	1.49	0.99	-0.99
ALL (1 GROUP)
Ordered	GroupSD
hsa-miR-126-3p	0.62
hsa-miR-146a-5p	0.75
hsa-miR-29a-3p	0.86
hsa-miR-222-3p	0.95
hsa-miR-191-5p	0.98
hsa-miR-16-5p	1.28
U6snRNA	1.33
hsa-miR-199b-3p	1.35
hsa-miR-145-5p	1.44
hsa-miR-150-5p	1.49
hsa-miR-196b-5p	1.85
hsa-miR-628-5p	1.9

## Sheet: Table S3 (geNorm)
Table S3. Results from stepwise geNorm analysis. Expression stability value M and pairwise variation for normalization factors V for different number of houskeeper molecules (HKMs) removing the least stable HKM in each step were calculated.
12 HKMs
hsa-miR-126-3p	hsa-miR-146a-5p	hsa-miR-29a-3p	hsa-miR-191-5p	hsa-miR-222-3p	hsa-miR-16-5p	hsa-miR-199b-3p	U6snRNA	hsa-miR-145-5p	hsa-miR-150-5p	hsa-miR-196b-5p	hsa-miR-628-5p
1.43152	1.48997	1.53941	1.5893	1.59432	1.75893	1.83	1.83186	1.87405	1.92492	2.21556	2.24754
Variable with lowest stability (highest M value): hsa-miR-628-5p
Average expression stability M: 1.777
Pairwise variation V12/11: 0.161
11 HKMs
hsa-miR-126-3p	hsa-miR-146a-5p	hsa-miR-29a-3p	hsa-miR-191-5p	hsa-miR-222-3p	hsa-miR-16-5p	hsa-miR-199b-3p	hsa-miR-145-5p	U6snRNA	hsa-miR-150-5p	hsa-miR-196b-5p
1.36285	1.43102	1.48163	1.51274	1.57082	1.68631	1.76765	1.79984	1.81974	1.87681	2.20612
Variable with lowest stability (highest M value): hsa-miR-196b-5p
Average expression stability M: 1.683
Pairwise variation V11/10: 0.176012520167823
10 HKMs
hsa-miR-126-3p	hsa-miR-146a-5p	hsa-miR-29a-3p	hsa-miR-191-5p	hsa-miR-222-3p	hsa-miR-16-5p	hsa-miR-145-5p	hsa-miR-199b-3p	U6snRNA	hsa-miR-150-5p
1.2941	1.35817	1.40339	1.42884	1.49352	1.59297	1.73056	1.7609	1.77521	1.83266
Variable with lowest stability (highest M value): hsa-miR-150-5p
Average expression stability M: 1.567
Pairwise variation V10/9: 0.156
9 HKMs
hsa-miR-126-3p	hsa-miR-29a-3p	hsa-miR-146a-5p	hsa-miR-191-5p	hsa-miR-222-3p	hsa-miR-16-5p	hsa-miR-145-5p	hsa-miR-199b-3p	U6snRNA
1.25956	1.34387	1.36666	1.39804	1.47171	1.55031	1.66166	1.68162	1.7722
Variable with lowest stability (highest M value): U6snRNA
Average expression stability M: 1.501
Pairwise variation V9/8: 0.169
8 HKMs
hsa-miR-126-3p	hsa-miR-29a-3p	hsa-miR-146a-5p	hsa-miR-191-5p	hsa-miR-222-3p	hsa-miR-16-5p	hsa-miR-145-5p	hsa-miR-199b-3p
1.21319	1.29594	1.34153	1.38155	1.46946	1.48886	1.56935	1.62437
Variable with lowest stability (highest M value): hsa-miR-199b-3p
Average expression stability M: 1.423
Pairwise variation V8/7: 0.171
7 HKMs
hsa-miR-126-3p	hsa-miR-29a-3p	hsa-miR-146a-5p	hsa-miR-191-5p	hsa-miR-16-5p	hsa-miR-222-3p	hsa-miR-145-5p
1.16937	1.28064	1.29066	1.32179	1.41052	1.4219	1.59657
Variable with lowest stability (highest M value): hsa-miR-145-5p
Average expression stability M: 1.356
Pairwise variation V7/6: 0.197
6 HKMs
hsa-miR-126-3p	hsa-miR-146a-5p	hsa-miR-29a-3p	hsa-miR-191-5p	hsa-miR-222-3p	hsa-miR-16-5p
1.14142	1.22062	1.24226	1.24778	1.34583	1.36003
Variable with lowest stability (highest M value): hsa-miR-16-5p
Average expression stability M: 1.260
Pairwise variation V6/5: 0.191
5 HKMs
hsa-miR-126-3p	hsa-miR-146a-5p	hsa-miR-29a-3p	hsa-miR-222-3p	hsa-miR-191-5p
1.12858	1.13935	1.18905	1.27652	1.31387
Variable with lowest stability (highest M value): hsa-miR-191-5p
Average expression stability M: 1.209
Pairwise variation V5/4: 0.224
4 HKMs
hsa-miR-146a-5p	hsa-miR-29a-3p	hsa-miR-126-3p	hsa-miR-222-3p
1.07296	1.12573	1.14317	1.21764
Variable with lowest stability (highest M value): hsa-miR-222-3p
Average expression stability M: 1.140
Pairwise variation V4/3: 0.264
3 HKMs
hsa-miR-126-3p	hsa-miR-146a-5p	hsa-miR-29a-3p
1.04716	1.05833	1.08082
Variable with lowest stability (highest M value): hsa-miR-29a-3p
Average expression stability M: 1.062
Pairwise variation V3/2: 0.317
2 HKMs
hsa-miR-126-3p	hsa-miR-146a-5p
1.02468	1.02468
Variable with lowest stability (highest M value): hsa-miR-146a-5p
Average expression stability M: 1.025

## Sheet: Table S4 (Pvalues)
Table S4. Significance (adjusted p-values) of expression (CT-values) differences between tumor sites and between groups with different states.
	SOURCE*	STATUS**
	PRIM/METAS	TNBC/HR+/HER2+
MIR	adj P (BH)	adj P (BH)
U6snRNA	0.951953	0.128415
hsa-miR-126-3p	0.358805	0.0750178
hsa-miR-29a-3p	0.358805	0.110993
hsa-miR-199b-3p	0.822755	0.0750178
hsa-miR-222-3p	0.291746	0.00756992
hsa-miR-146a-5p	0.358805	0.00633064
hsa-miR-191-5p	0.648699	0.128415
hsa-miR-150-5p	0.358805	0.279309
hsa-miR-196b-5p	0.337294	0.275005
hsa-miR-145-5p	0.770292	0.0750178
hsa-miR-628-5p	0.951953	0.070173
hsa-miR-16-5p	0.377146	0.0750178
* Wilcoxon rank-sum test
** Kruskal-Wallis test
BH: p-values were adjusted based on the false discovery rate (FDR) according to the Benjamini-Hochberg procedure.
METAS: samples derived from metastasis; PRIM: samples derived from primary;
HER2+: HER2 positive; HR+: hormone receptor positive; TNBC: triple negative breast cancer

## Sheet: Figure S1
Figure S1. Boxplots of miRNA expression (CT-values) of housekeeper candidates per subgroup. METAS: samples derived from metastasis; PRIM: samples derived from primary; HER2+: HER2 positive; HR+: hormone receptor positive; TNBC: triple negative breast cancer

## Sheet: Figure S2
Figure S2. Results from geNorm analysis. Average expression stability M of all remaining housekeeper candidates after stepwise exclusion of the least stable reference candidate (upper panel). Pairwise variation (V) between normalization factors consisting of a different number of housekeeper candidates in a stepwise procedure, where microRNAs were sequentially included into the normalization fact…
